# Supplementary material for: Efficacy and safety of D,L-3-hydroxybutyrate (D,L-3-HB) treatment in multiple acyl-CoA dehydrogenase deficiency
Source: PubMed Central journal article supplement — Genet Med. 2020 Jan 6;22(5):908–16. doi: 10.1038/s41436-019-0739-z (PMC7200590; doi:10.1038/s41436-019-0739-z), 2020-01-06
Supplement: 41436_2019_739_MOESM1_ESM.pdf [file 41436_2019_739_MOESM1_ESM.pdf]

## **Supplementary appendix**

**Supplementary Table 1. Overview of D,L-3-hydroxybutyrate treatment in 34 patients with inborn errors of metabolism; results from the systematic literature review.**

Legend: Phenotype MIM number: <http://www.omim.org/>. The presence (+) or absence (-) of clinical improvement regarding <sup>a</sup>liver symptoms including hepatic/hyperammonemic encephalopathy (+), hypoglycemia (+) and poor metabolic control (+); <sup>b</sup>muscle symptoms including myopathy (+) and hypotonia (+). <sup>c</sup>Personal knowledge or communication; <sup>d</sup>unclear which patient(s). Abbreviations (in alphabetical order): CACT, carnitine-acylcarnitine translocase; GSD, glycogen storage disease; HMG-CoA, 3-hydroxy-3-methylglutaryl-coenzyme A; multiple acyl-CoA dehydrogenase deficiency; NR, not reported; PA, propionic acidemia; PHHI, persistent hyperinsulinemic hypoglycemia of infancy; RFVT, riboflavin transport; VLCAD, very long-chain acyl-CoA dehydrogenase.

| Reference                             | Inborn error of metabolism (#MIM)            | n (M/F) | Age onset  | Age start        | D,L-3-HB dose range (mg/kg/d) | D,L-3-HB indication: X<br>Clinical improvement: (+/-/NR) |                |                                                                                    |                     |                     | Side effect(s)                        |
|---------------------------------------|----------------------------------------------|---------|------------|------------------|-------------------------------|----------------------------------------------------------|----------------|------------------------------------------------------------------------------------|---------------------|---------------------|---------------------------------------|
|                                       |                                              |         |            |                  |                               | Cardiomyopathy                                           | Leukodystrophy | Liver <sup>a</sup>                                                                 | Muscle <sup>b</sup> | Respiratory failure |                                       |
| Francois, 1981                        | HMG-CoA lyase deficiency (246450)            | 1 (1/0) | 1 d        | 8 m              | 760                           |                                                          |                | X (+)                                                                              |                     |                     | NR                                    |
| Bougneres, 1983                       | PHHI (256450)                                | 4 (4/0) | 1 - 10 d   | 3 - 32 m         | 115 - 150                     |                                                          |                | X (+)                                                                              |                     |                     | No                                    |
| Bonham, 1999; Olpin, 2004             | MADD (231680)                                | 1 (0/1) | NS         | 14 m             | 1 - 10 g/d                    |                                                          |                | X (+)                                                                              | X (+)               |                     | No                                    |
| Van Hove, 2001, 2003; Grunewald, 2008 | MADD (231680)                                | 3 (2/1) | 6 d - 5 m  | 2 - 28 m         | 80 - 900                      | X (+)                                                    | X (+)          | X (+)                                                                              | X (+)               |                     | No                                    |
| Plecko, 2002                          | PHHI (256450)                                | 2 (1/1) | 0 - 1 d    | 6 m              | 880 - 4000                    |                                                          |                | X (NR)                                                                             |                     |                     | No                                    |
| Van Spronsen, 2005                    | RFVT3 deficiency <sup>c</sup> (211530)       | 1 (1/0) | 5 m        | 5 m <sup>c</sup> | 700                           |                                                          |                |                                                                                    | X (+) <sup>c</sup>  | X (+)               | Constipation, diarrhea <sup>c</sup>   |
| Al-Hertani, 2008                      | MADD (231680)                                | 1 (0/1) | 6 m        | NR               | NR                            |                                                          |                | X (+) <sup>c</sup>                                                                 |                     |                     | No <sup>c</sup>                       |
| Marquardt, 2009                       | MADD (231680)                                | 2 (NR)  | NR         | NR               | NR                            |                                                          |                | X (NR)                                                                             |                     |                     | Metabolic alkalosis, nephrocalcinosis |
| Bhattacharya, 2010                    | HMG-CoA lyase deficiency (246450)            | 1 (1/0) | 1 d        | 1.5 m            | 300                           |                                                          |                | X (+)                                                                              |                     |                     | No                                    |
|                                       | MADD (231680)                                | 4 (NR)  | <1 m - 5 m | 7 d - 5 m        | 300 - 900                     | X (+) <sup>c</sup>                                       |                | X (+)                                                                              | X (+)               | X (+) <sup>c</sup>  | NR                                    |
| Dalkeith, 2010, 2013                  | HMG-CoA lyase deficiency (24645)             | 2 (NR)  | NR         | 3 m - 16 y       | 300 - 900                     |                                                          |                | Youngest patient was treated empirically (NR); the oldest for liver symptoms (NR). |                     |                     | NR                                    |
|                                       | CACT deficiency (212138)                     | 1 (NR)  | NR         | <1 m             | 300 - 900                     | X (+)                                                    |                | X (+)                                                                              |                     |                     |                                       |
| Van, 2010                             | GSD type III (232400)                        | 2 (NR)  | NR         | 1 - 9 y          | 600 - 900                     |                                                          |                |                                                                                    |                     |                     |                                       |
|                                       | Mitochondrial complex IV deficiency (220110) | 2 (NR)  | NR         | 1 - 9 y          | 600 - 900                     |                                                          |                |                                                                                    |                     |                     |                                       |
|                                       | VLCAD deficiency (201475)                    | 1 (NR)  | NR         | 1 - 9 y          | 600 - 900                     |                                                          |                |                                                                                    |                     | X (+) <sup>d</sup>  | No                                    |
|                                       | PA (606054)                                  | 1 (NR)  | NR         | 1 - 9 y          | 600 - 900                     |                                                          |                |                                                                                    |                     |                     |                                       |

|                       |                           |         |                  |                  |                        |  |       |                    |                    |                                                          |
|-----------------------|---------------------------|---------|------------------|------------------|------------------------|--|-------|--------------------|--------------------|----------------------------------------------------------|
| Bosch, 2011           | RFVT3 deficiency (211530) | 1 (0/1) | 6 m <sup>c</sup> | 7 m <sup>c</sup> | 480 - 860 <sup>c</sup> |  |       | X (-) <sup>c</sup> | X (-) <sup>c</sup> | NR                                                       |
| Hale, 2011            | Presumptive MADD (231680) | 1 (0/1) | 1 d              | 7 m              | 300 - 1200             |  | X (-) |                    | X (-)              | NR                                                       |
| Valayannopoulos, 2011 | GSD type III (232400)     | 1 (1/0) | NR               | 2 m              | 400 - 800              |  | X (+) | X (+)              |                    | No                                                       |
| Van Rijt, 2014        | MADD (231680)             | 1 (0/1) | 0 d              | 7 m              | 450 - 2600             |  | X (+) | X (+) <sup>c</sup> | X (+) <sup>c</sup> | <i>Mild</i> dehydration, diarrhea, vomiting <sup>c</sup> |
| Gautschi, 2015        | MADD (231680)             | 1 (1/0) | 2.5 y            | 4 y              | 300 - 900              |  |       | X (+)              | X (+)              | Indigestion, dehydration                                 |

**Supplementary Table 2. Individual D,L-3-hydroxybutyrate treatment characteristics and outcome; results from the retrospective cohort study.**

Legend: The presence (+) or absence (-) of clinical improvement regarding <sup>a</sup>liver symptoms including hyperammonemia (+), hypoglycemia (+), liver dysfunction/failure (+) and metabolic acidosis (+); <sup>b</sup>muscle symptoms including exercise intolerance (+), hypotonia (+), myopathy (+) and rhabdomyolysis (+). <sup>c</sup>Patient has been published before in relation to D,L-3-HB treatment, see corresponding reference in manuscript; <sup>d</sup>consanguinity; <sup>e</sup>deceased; <sup>f</sup>diagnosed prenatally due to family history; <sup>g</sup>prescribed as food supplement (Ketoforce). Abbreviation: NR, not reported.

| Patient                  | Age start D,L-3-HB | D,L-3-HB indication: X<br>Clinical improvement reported: (+/-)                                                                            |                 |                    |                     |                     | Range of D,L-3-HB dose (mg/kg/d) | Administration method(s)                  | Safety                                                                              | D,L-3-HB discontinued        |
|--------------------------|--------------------|-------------------------------------------------------------------------------------------------------------------------------------------|-----------------|--------------------|---------------------|---------------------|----------------------------------|-------------------------------------------|-------------------------------------------------------------------------------------|------------------------------|
|                          |                    | Cardio-myopathy                                                                                                                           | Leuko-dystrophy | Liver <sup>a</sup> | Muscle <sup>b</sup> | Respiratory failure |                                  |                                           |                                                                                     |                              |
| 1 <sup>c(#7)d</sup>      | 7 m                | X (+)                                                                                                                                     | X (+)           |                    | X (+)               | (+)                 | 450 - 2600                       | Gastrostomy/<br>nasogastric tube,<br>oral | <i>Prolonged</i> hospitalization,<br><i>mild</i> dehydration, diarrhea,<br>vomiting | No                           |
| 2                        | 10 +<br>1/12 y     |                                                                                                                                           |                 |                    | X (+)               |                     | 250 - 500                        | Oral                                      | <i>Infrequent</i> abdominal pain                                                    | No                           |
| 3 <sup>e</sup>           | 9 d                | Preventive treatment aspect (-), deceased after 1 d.                                                                                      |                 |                    |                     |                     | 900 - 1800                       | Nasogastric tube                          | Death                                                                               | Yes, death                   |
| 4 <sup>c(#17,18)de</sup> | 19 d               |                                                                                                                                           |                 | X (+)              | X (+)               | X (+)               | 300 - 600                        | Oral                                      | Death                                                                               | Yes, death                   |
| 5                        | 9 m                |                                                                                                                                           |                 | X (+)              | X (+)               |                     | 130 - 1000                       | Nasogastric tube                          | <i>Mild</i> vomiting                                                                | No                           |
| 6 <sup>c(#17,18)</sup>   | 6 m                | X (+)                                                                                                                                     |                 | X (+)              | X (+)               |                     | 200 - 650                        | Gastrostomy tube,<br>oral                 | -                                                                                   | No                           |
| 7                        | 6 m                | Questionable due to preventive treatment aspect.                                                                                          |                 |                    |                     |                     | 200 - 2000                       | Gastrostomy/<br>nasogastric tube          | <i>Chronic</i> nausea and<br>vomiting                                               | Yes, side effects            |
| 8 <sup>de</sup>          | 2 m                | Liver, muscle and preventive treatment; questionable due to very early start and preventive treatment aspect, patient seemed more stable. |                 |                    |                     |                     | 355 - 395                        | Nasogastric tube                          | Death                                                                               | Yes, death                   |
| 9                        | 2 m                | Low C2 carnitine (-).                                                                                                                     |                 |                    |                     |                     | 100 - 950                        | Oral                                      | -                                                                                   | No                           |
| 10                       | 2 +<br>5/12 y      |                                                                                                                                           |                 |                    | X (+)               | X (+)               | 650 - 1200                       | Oral                                      | -                                                                                   | No                           |
| 11 <sup>e</sup>          | 28 +<br>6/12 y     |                                                                                                                                           |                 | X (+)              | X (+)               |                     | 450                              | Oral                                      | -                                                                                   | Yes, costs                   |
| 12 <sup>c(#17,18)</sup>  | 5 m                |                                                                                                                                           |                 |                    | X (+)               |                     | 200 - 300                        | Oral                                      | -                                                                                   | Yes, no treatment compliance |
| 13 <sup>c(#15)</sup>     | 4 +<br>3/12 y      |                                                                                                                                           | X (+)           |                    |                     |                     | 500                              | Oral                                      | -                                                                                   | No                           |
| 14                       | 4 +<br>6/12 y      | Leukodystrophy and muscle treatment; questionable due to short treatment duration of only three months at time of data collection.        |                 |                    |                     |                     | 150                              | Oral                                      | -                                                                                   | No                           |
| 15                       | 24 +<br>9/12 y     |                                                                                                                                           | X (+)           |                    | (+)                 |                     | 560 - 600                        | Oral                                      | <i>Mild</i> dehydration,<br>abdominal pain,<br>constipation                         | No                           |
| 16 <sup>df</sup>         | 5 +<br>1/12 y      |                                                                                                                                           |                 |                    | X (+)               |                     | 300 - 1000                       | Oral                                      | <i>Mild</i> diarrhea                                                                | No                           |
| 17 <sup>c(#8)d</sup>     | 3 +<br>11/12 y     |                                                                                                                                           | X (+)           |                    | X (+)               |                     | 480 - 900                        | Gastrostomy tube                          | <i>Mild</i> dehydration                                                             | No                           |
| 18                       | 25 +<br>11/12 y    |                                                                                                                                           |                 | X (+)              | X (+)               |                     | 900                              | Nasogastric tube                          | -                                                                                   | Yes, clinical improvement    |

|                          |      |       |       |       |                        |                        |                        |                                |
|--------------------------|------|-------|-------|-------|------------------------|------------------------|------------------------|--------------------------------|
| 19                       | 25 y |       | X (-) | X (-) | 500 - 750 <sup>g</sup> | Oral                   | -                      | Yes, ineffectiveness and costs |
| 20 <sup>c(#17,18)e</sup> | 3 m  |       | X (+) | X (+) | 300 - 600              | Oral                   | Death                  | Yes, death                     |
| 21 <sup>e</sup>          | 3 m  | X (+) |       |       | NR                     | Oral                   | Death                  | Yes, death                     |
| 22 <sup>c(#10)</sup>     | 5 m  |       | X (+) | X (+) | 330 - 730              | Nasogastric tube, oral | Constipation, diarrhea | Yes, clinical improvement      |
| 23 <sup>c(#11)</sup>     | 7 m  |       | X (-) | X (-) | 480 - 860              | Nasogastric tube       | -                      | Yes, ineffectiveness           |

**Supplementary Figure 1. Symptom based indication and efficacy of D,L-3-hydroxybutyrate treatment.**

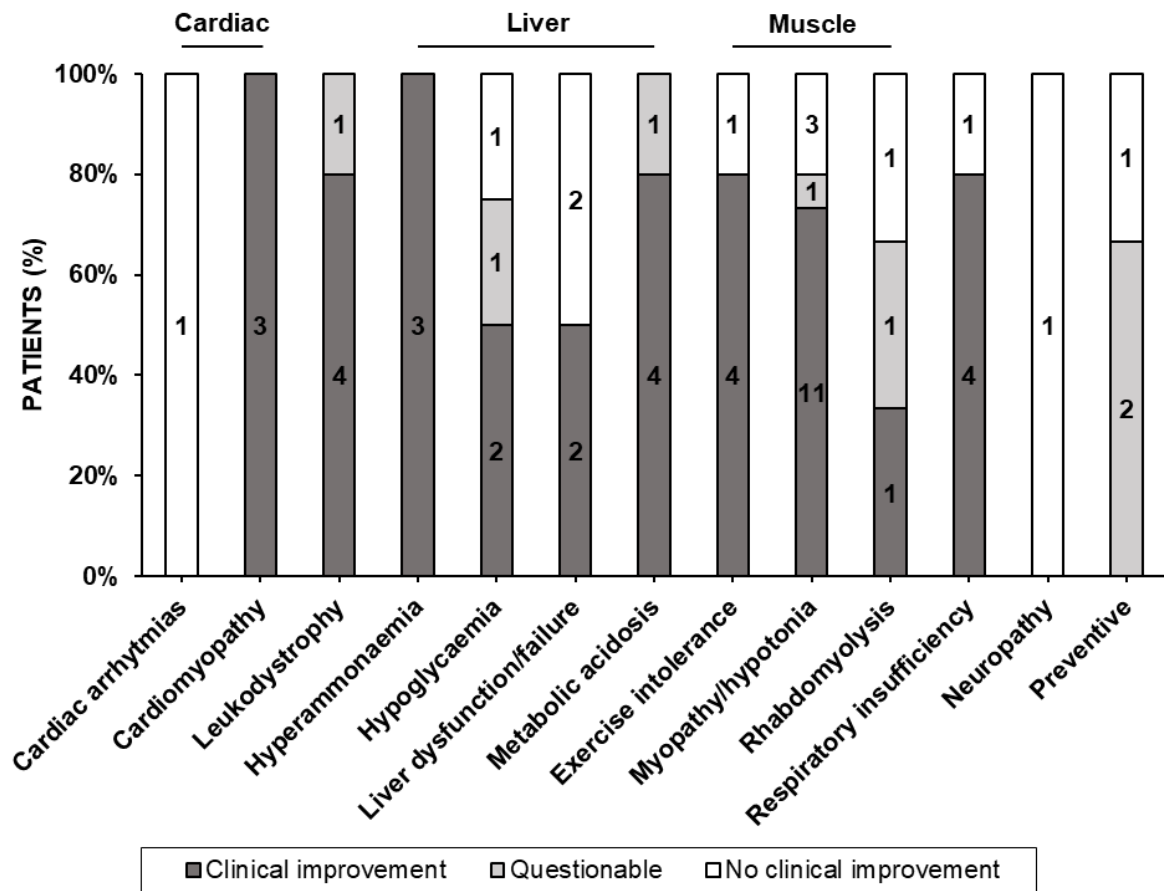

Legend: Proportion of MADD(-like)-patients with symptom based indication and efficacy of D,L-3-HB treatment, with the numbers presented in the columns.

## Supplementary Data 1. Detailed description of the systematic literature review methods.

**Presentation of the original search strategy.** Original search strategy implemented in PubMed database retrieved 310 hits on September 27<sup>th</sup>, 2016.

("Hydroxybutyrates"[Mesh] OR "3-Hydroxybutyric Acid"[Mesh] OR "Ketone Bodies"[Mesh] OR 3-Hydroxybutyr\*[tiab] OR beta-Hydroxybutyr\*[tiab] OR 3hydroxybutyr\*[tiab] OR b-hydroxybutyr\*[tiab]) AND ("Metabolism, Inborn Errors"[Mesh] OR "Multiple Acyl Coenzyme A Dehydrogenase Deficiency"[Mesh] OR MADD[tiab] OR Multiple Acyl-CoA Dehydrogenase Deficien\*[tiab] OR "Glutaric Aciduria"[tiab] OR ETFDH Deficien\*[tiab] OR ETFA Deficien\*[tiab] OR ETFB Deficien\*[tiab]) NOT (("Animals"[Mesh] NOT "Humans"[Mesh]) OR animal[ti] OR mouse[ti] OR mice[ti] OR rodent\*[ti] OR rat[ti] OR rats[ti])

### Protocol of the screening process and data extraction.

The screening process was performed independently by two reviewers (WvR & EJ). Articles were included based upon the presence of detailed patient data concerning D,L-3-HB or ketone body treatment as well as a confirmed diagnosis by biochemical (acylcarnitine or organic acid profile), DNA, or enzymatic analysis. The following exclusion criteria were maintained: a) no detailed patient data described, b) lack of accessibility of the abstracts or articles, c) no availability in English or Dutch language.

Nine articles were included as search outcome after completion of the screening process and one was added due to personal knowledge of the literature.<sup>1</sup> To prevent missing any publications, we extended our search with two approaches: 2) screening publications, identified via Web of Science, which cited the already included publications, and 3) screening the reference lists of already previously retrieved (included and excluded) full text publications. This resulted in the addition of two and four publications to our search outcome, respectively (n = 16 in total). To minimize the risk of missing data, we expanded our original search strategy with terms used in abstracts or articles which were only found through the 2<sup>nd</sup> and 3<sup>rd</sup> search approach. This led to the inclusion of two more publications (n = 18 in total). Finally, two more publications were added due to personal knowledge and communication (n = 20 in total).<sup>2,3</sup>

General study characteristics and data on clinical presentation and D,L-3-HB treatment per inborn error of metabolism were collected independently by two reviewers (WvR & EJ).

Consensus on eligibility during the screening process and data extraction was reached through regular meetings. If necessary, a third, independent reviewer (TD) was consulted to make the final call on eligibility.

**Presentation of the extended search strategy.** Extended search strategy implemented in PubMed database retrieved 333 hits on December 21<sup>st</sup>, 2016.

("Hydroxybutyrates"[Mesh] OR "3-Hydroxybutyric Acid"[Mesh] OR "Ketone Bodies"[Mesh] OR 3-Hydroxybutyr\*[tiab] OR beta-Hydroxybutyr\*[tiab] OR 3hydroxybutyr\*[tiab] OR b-hydroxybutyr\*[tiab] OR D,L-3-hydroxybutyr\*[tiab] OR OH-B[tiab] OR 3-HB[tiab] OR B-OHB[tiab] OR BOHB[tiab]) AND ("Metabolism, Inborn Errors"[Mesh] OR "Multiple Acyl Coenzyme A Dehydrogenase Deficiency"[Mesh] OR MADD[tiab] OR Multiple Acyl-CoA Dehydrogenase Deficien\*[tiab] OR Multiple Acyl CoA Dehydrogenase Deficien\*[tiab] OR "Glutaric Aciduria"[tiab] OR ETFDH Deficien\*[tiab] OR ETFA Deficien\*[tiab] OR ETFB Deficien\*[tiab] OR "3-Hydroxy-3-Methylglutaryl-CoA Lyase Deficiency"[Mesh] OR "HMG-CoA lyase"[tiab] OR "HMG Co-A lyase"[tiab] OR 3-hydroxy-3-methylglutaryl-coenzyme A lyase deficien\*[tiab] OR "Congenital Hyperinsulinism"[Mesh] OR "persistent hyperinsulinemic hypoglycemia"[tiab] OR PHHI[tiab] OR "persistent hypoglycemia and hyperinsulinism"[tiab] OR "Glycogen Storage Disease Type III" [MESH] OR "Glycogenesis type III"[tiab] OR "Glycogen storage disease type 3" [tiab] OR "Cytochrome-c Oxidase Deficiency"[MESH] OR "Deficiency in complex IV of respiratory chain"[tiab] OR "Mitochondrial complex IV deficiency" [tiab] OR "VLCAD deficiency"[MESH] OR "Deficiency on very long chain acyl-CoA dehydrogenase"[tiab] OR "Very long-chain acyl-coa dehydrogenase deficiency"[tiab] OR "Propionic academia"[MESH] OR "Ketotic hyperglycinemia"[tiab]) NOT (("Animals"[Mesh] NOT "Humans"[Mesh]) OR animal[ti] OR mouse[ti] OR mice[ti] OR rodent\*[ti] OR rat[ti] OR rats[ti])

**Flowchart of the screening process.** Implementation of the original search strategy in PubMed and EMBASE databases on September 27<sup>th</sup>, 2016 resulted in 310 and 286 hits, respectively.

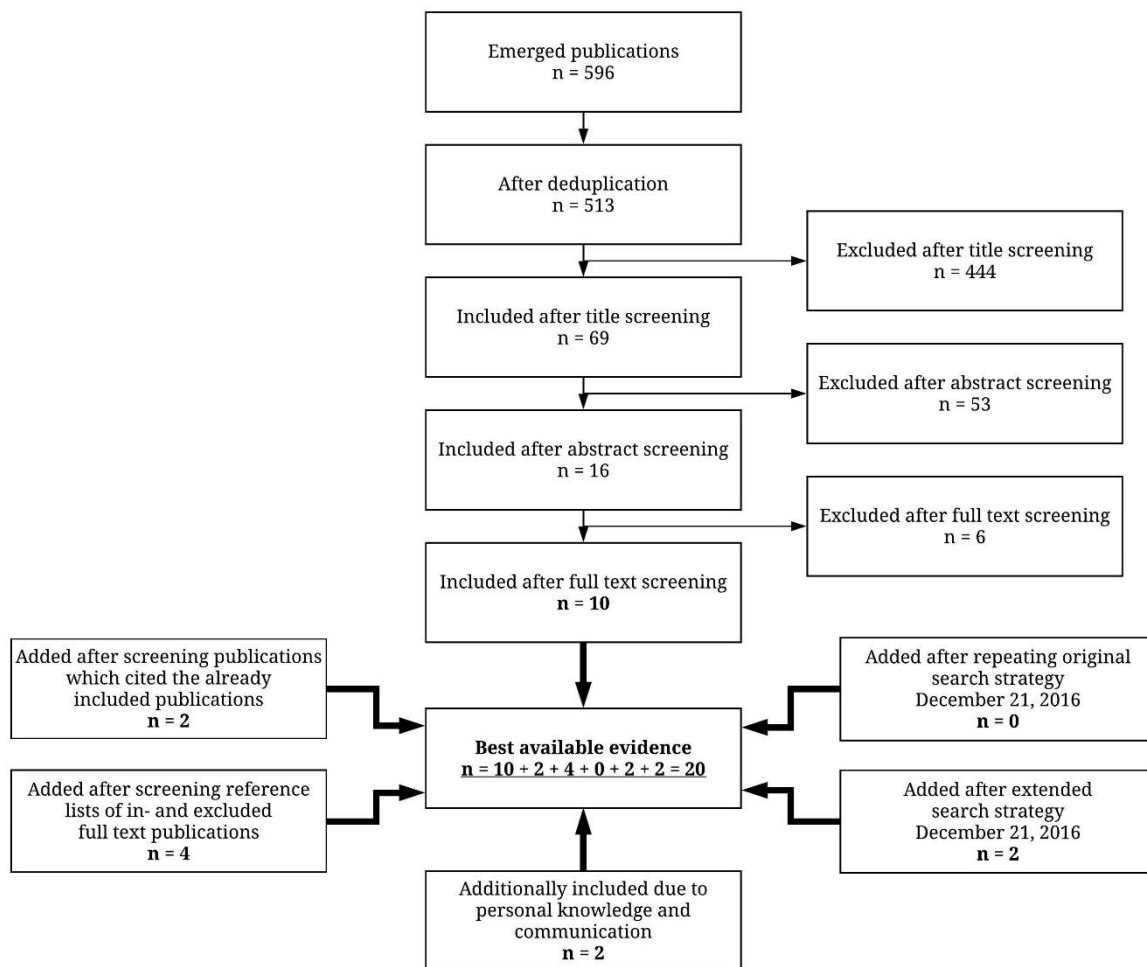



**PRISMA-P (Preferred Reporting Items for Systematic review and Meta-Analysis Protocols) 2015 checklist.**  
Adapted from Moher et al, 2015.<sup>4</sup>

| <b>Section and topic</b>          | <b>Item No</b> | <b>Checklist item</b>                                                                                                                                                                                                         | <b>Reported in section</b> |
|-----------------------------------|----------------|-------------------------------------------------------------------------------------------------------------------------------------------------------------------------------------------------------------------------------|----------------------------|
| <b>ADMINISTRATIVE INFORMATION</b> |                |                                                                                                                                                                                                                               |                            |
| Title:                            |                |                                                                                                                                                                                                                               |                            |
| Identification                    | 1a             | Identify the report as a protocol of a systematic review                                                                                                                                                                      | Introduction, Methods      |
| Update                            | 1b             | If the protocol is for an update of a previous systematic review, identify as such                                                                                                                                            | N/A                        |
| Registration                      | 2              | If registered, provide the name of the registry (such as PROSPERO) and registration number                                                                                                                                    | N/A                        |
| Authors:                          |                |                                                                                                                                                                                                                               |                            |
| Contact                           | 3a             | Provide name, institutional affiliation, e-mail address of all protocol authors; provide physical mailing address of corresponding author                                                                                     | Title page                 |
| Contributions                     | 3b             | Describe contributions of protocol authors and identify the guarantor of the review                                                                                                                                           | Suppl. Data 1              |
| Amendments                        | 4              | If the protocol represents an amendment of a previously completed or published protocol, identify as such and list changes; otherwise, state plan for documenting important protocol amendments                               | N/A                        |
| Support:                          |                |                                                                                                                                                                                                                               |                            |
| Sources                           | 5a             | Indicate sources of financial or other support for the review                                                                                                                                                                 | Methods                    |
| Sponsor                           | 5b             | Provide name for the review funder and/or sponsor                                                                                                                                                                             | Methods                    |
| Role of sponsor or funder         | 5c             | Describe roles of funder(s), sponsor(s), and/or institution(s), if any, in developing the protocol                                                                                                                            | Methods                    |
| <b>INTRODUCTION</b>               |                |                                                                                                                                                                                                                               |                            |
| Rationale                         | 6              | Describe the rationale for the review in the context of what is already known                                                                                                                                                 | Introduction               |
| Objectives                        | 7              | Provide an explicit statement of the question(s) the review will address with reference to participants, interventions, comparators, and outcomes (PICO)                                                                      | Introduction, Methods      |
| <b>METHODS</b>                    |                |                                                                                                                                                                                                                               |                            |
| Eligibility criteria              | 8              | Specify the study characteristics (such as PICO, study design, setting, time frame) and report characteristics (such as years considered, language, publication status) to be used as criteria for eligibility for the review | Methods, Suppl. Data 1     |
| Information sources               | 9              | Describe all intended information sources (such as electronic databases, contact with study authors, trial registers or other grey literature sources) with planned dates of coverage                                         | Methods, Suppl. Data 1     |
| Search strategy                   | 10             | Present draft of search strategy to be used for at least one electronic database, including planned limits, such that it could be repeated                                                                                    | Suppl. Data 1              |
| Study records:                    |                |                                                                                                                                                                                                                               |                            |
| Data management                   | 11a            | Describe the mechanism(s) that will be used to manage records and data throughout the review                                                                                                                                  | Suppl. Data 1              |
| Selection process                 | 11b            | State the process that will be used for selecting studies (such as two independent reviewers) through each phase of the review (that is, screening, eligibility and inclusion in meta-analysis)                               | Suppl. Data 1              |
| Data collection process           | 11c            | Describe planned method of extracting data from reports (such as piloting forms, done independently, in duplicate), any processes for obtaining and confirming data from investigators                                        | Suppl. Data 1              |
| Data items                        | 12             | List and define all variables for which data will be sought (such as PICO items, funding sources), any pre-planned data assumptions and simplifications                                                                       | Methods, Suppl. Data 1     |

|                                    |     |                                                                                                                                                                                                                                                  |                                        |
|------------------------------------|-----|--------------------------------------------------------------------------------------------------------------------------------------------------------------------------------------------------------------------------------------------------|----------------------------------------|
| Outcomes and prioritization        | 13  | List and define all outcomes for which data will be sought, including prioritization of main and additional outcomes, with rationale                                                                                                             | Methods, Suppl. Data 1                 |
| Risk of bias in individual studies | 14  | Describe anticipated methods for assessing risk of bias of individual studies, including whether this will be done at the outcome or study level, or both; state how this information will be used in data synthesis                             | Discussion, Suppl. Data 1              |
| Data synthesis                     | 15a | Describe criteria under which study data will be quantitatively synthesised                                                                                                                                                                      | Suppl. Data 1, Suppl. Table 1          |
|                                    | 15b | If data are appropriate for quantitative synthesis, describe planned summary measures, methods of handling data and methods of combining data from studies, including any planned exploration of consistency (such as $I^2$ , Kendall's $\tau$ ) | N/A                                    |
|                                    | 15c | Describe any proposed additional analyses (such as sensitivity or subgroup analyses, meta-regression)                                                                                                                                            | N/A                                    |
|                                    | 15d | If quantitative synthesis is not appropriate, describe the type of summary planned                                                                                                                                                               | Suppl. Data 1, Suppl. Table 1          |
| Meta-bias(es)                      | 16  | Specify any planned assessment of meta-bias(es) (such as publication bias across studies, selective reporting within studies)                                                                                                                    | Discussion, Suppl. Data 1              |
| Confidence in cumulative evidence  | 17  | Describe how the strength of the body of evidence will be assessed (such as GRADE)                                                                                                                                                               | Retrospective cohort study, Discussion |

### References to Supplementary Data 1

1. Bosch AM, Abeling NG, Ijlst L, et al. Brown-vialetto-van laere and fazio londe syndrome is associated with a riboflavin transporter defect mimicking mild MADD: A new inborn error of metabolism with potential treatment. *J Inherit Metab Dis*. 2011;34(1):159-164.
2. van Spronsen FJ, de Weerd W, Goorhuis J, et al. Respiratory insufficiency as first presentation of multiple acyl-CoA dehydrogenase deficiency (MADD). *J Inherit Metab Dis*. 2005;28(Suppl 1):115.
3. Al-Hertani W, Mineyko A, Humphreys P, Chakraborty P, Geraghty MT. Glutaric aciduria type II presenting with lipid myopathy, progressive leukodystrophy; intrafamilial variation in two siblings. .
4. Moher D, Shamseer L, Clarke M, et al. Preferred reporting items for systematic review and meta-analysis protocols (PRISMA-P) 2015 statement. *Syst Rev*. 2015;4(1):1.

**Supplementary Data 2. STROBE Statement - Checklist of items that should be included in reports of cohort studies.**

|                           | <b>Item No</b> | <b>Recommendation</b>                                                                                                                                                                               | <b>Reported in section</b>      |
|---------------------------|----------------|-----------------------------------------------------------------------------------------------------------------------------------------------------------------------------------------------------|---------------------------------|
| <b>Title and abstract</b> | 1              | (a) Indicate the study's design with a commonly used term in the title or the abstract                                                                                                              | Abstract, Introduction, Methods |
|                           |                | (b) Provide in the abstract an informative and balanced summary of what was done and what was found                                                                                                 | Abstract                        |
| <b>Introduction</b>       |                |                                                                                                                                                                                                     |                                 |
| Background/rationale      | 2              | Explain the scientific background and rationale for the investigation being reported                                                                                                                | Introduction                    |
| Objectives                | 3              | State specific objectives, including any pre-specified hypotheses                                                                                                                                   | Introduction, Methods           |
| <b>Methods</b>            |                |                                                                                                                                                                                                     |                                 |
| Study design              | 4              | Present key elements of study design early in the paper                                                                                                                                             | Methods                         |
| Setting                   | 5              | Describe the setting, locations, and relevant dates, including periods of recruitment, exposure, follow-up, and data collection                                                                     | Methods                         |
| Participants              | 6              | (a) Give the eligibility criteria, and the sources and methods of selection of participants. Describe methods of follow-up                                                                          | Methods                         |
|                           |                | (b) For matched studies, give matching criteria and number of exposed and unexposed                                                                                                                 | N/A                             |
| Variables                 | 7              | Clearly define all outcomes, exposures, predictors, potential confounders, and effect modifiers. Give diagnostic criteria, if applicable                                                            | Methods                         |
| Data sources/measurement  | 8*             | For each variable of interest, give sources of data and details of methods of assessment (measurement). Describe comparability of assessment methods if there is more than one group                | Methods                         |
| Bias                      | 9              | Describe any efforts to address potential sources of bias                                                                                                                                           | Methods                         |
| Study size                | 10             | Explain how the study size was arrived at                                                                                                                                                           | Methods                         |
| Quantitative variables    | 11             | Explain how quantitative variables were handled in the analyses. If applicable, describe which groupings were chosen and why                                                                        | Methods                         |
| Statistical methods       | 12             | (a) Describe all statistical methods, including those used to control for confounding                                                                                                               | Methods                         |
|                           |                | (b) Describe any methods used to examine subgroups and interactions                                                                                                                                 | Methods                         |
|                           |                | (c) Explain how missing data were addressed                                                                                                                                                         | Methods                         |
|                           |                | (d) If applicable, explain how loss to follow-up was addressed                                                                                                                                      | N/A                             |
|                           |                | (e) Describe any sensitivity analyses                                                                                                                                                               | N/A                             |
| <b>Results</b>            |                |                                                                                                                                                                                                     |                                 |
| Participants              | 13*            | (a) Report numbers of individuals at each stage of study - eg numbers potentially eligible, examined for eligibility, confirmed eligible, included in the study, completing follow-up, and analysed | Results                         |
|                           |                | (b) Give reasons for non-participation at each stage                                                                                                                                                | Results                         |
|                           |                | (c) Consider use of a flow diagram                                                                                                                                                                  | N/A                             |

|                          |     |                                                                                                                                                                                                              |            |
|--------------------------|-----|--------------------------------------------------------------------------------------------------------------------------------------------------------------------------------------------------------------|------------|
| Descriptive data         | 14* | (a) Give characteristics of study participants (eg demographic, clinical, social) and information on exposures and potential confounders                                                                     | Results    |
|                          |     | (b) Indicate number of participants with missing data for each variable of interest                                                                                                                          | Results    |
|                          |     | (c) Summarise follow-up time (eg, average and total amount)                                                                                                                                                  | Results    |
| Outcome data             | 15* | Report numbers of outcome events or summary measures over time                                                                                                                                               | Results    |
| Main results             | 16  | (a) Give unadjusted estimates and, if applicable, confounder-adjusted estimates and their precision (eg, 95% confidence interval). Make clear which confounders were adjusted for and why they were included | Results    |
|                          |     | (b) Report category boundaries when continuous variables were categorized                                                                                                                                    | Results    |
|                          |     | (c) If relevant, consider translating estimates of relative risk into absolute risk for a meaningful time period                                                                                             | N/A        |
| Other analyses           | 17  | Report other analyses done - eg analyses of subgroups and interactions, and sensitivity analyses                                                                                                             | Results    |
| <b>Discussion</b>        |     |                                                                                                                                                                                                              |            |
| Key results              | 18  | Summarise key results with reference to study objectives                                                                                                                                                     | Discussion |
| Limitations              | 19  | Discuss limitations of the study, taking into account sources of potential bias or imprecision. Discuss both direction and magnitude of any potential bias                                                   | Discussion |
| Interpretation           | 20  | Give a cautious overall interpretation of results considering objectives, limitations, multiplicity of analyses, results from similar studies, and other relevant evidence                                   | Discussion |
| Generalisability         | 21  | Discuss the generalisability (external validity) of the study results                                                                                                                                        | Discussion |
| <b>Other information</b> |     |                                                                                                                                                                                                              |            |
| Funding                  | 22  | Give the source of funding and the role of the funders for the present study and, if applicable, for the original study on which the present article is based                                                | Methods    |
